# Supplementary material
Source: HighWire-hosted journal article supplement (https://erj.ersjournals.com/content/58/4/2101615)
Supplement: inline-supplementary-material-1 [file inline-supplementary-material-1.pdf]

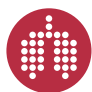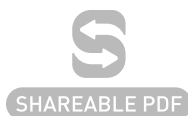

# Improving ethnic diversity in respiratory genomics research

Martin D. Tobin <sup>1,2</sup> and Abril G. Izquierdo<sup>1</sup>

<sup>1</sup>Dept of Health Sciences, University of Leicester, Leicester, UK. <sup>2</sup>Leicester NIHR Biomedical Research Centre, Leicester, UK.

Corresponding author: Martin D. Tobin ([martin.tobin@leicester.ac.uk](mailto:martin.tobin@leicester.ac.uk))

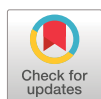

Shareable abstract (@ERSpublications)

**This editorial highlights a lung function genomics study from the China Kadoorie Biobank with perspectives on ethnic diversity in respiratory genomics research, and the urgent need to improve diversity in that area of research** <https://bit.ly/3xDmmeZ>

**Cite this article as:** Tobin MD, Izquierdo AG. Improving ethnic diversity in respiratory genomics research. *Eur Respir J* 2021; 58: 2101615 [DOI: 10.1183/13993003.01615-2021].

This single-page version can be shared freely online.

Copyright ©The authors 2021. For reproduction rights and permissions contact [permissions@ersnet.org](mailto:permissions@ersnet.org)

Received: 7 June 2021  
Accepted: 16 June 2021

In this issue of the *European Respiratory Journal*, ZHU *et al.* [1] report findings from a genomic study of lung function in the China Kadoorie Biobank.
